# Supplementary material
Source: MDPI journal article supplement (https://www.mdpi.com/2304-6740/5/3/48)

# checkCIF/PLATON report

Structure factors have been supplied for datablock(s) Comp2

THIS REPORT IS FOR GUIDANCE ONLY. IF USED AS PART OF A REVIEW PROCEDURE FOR PUBLICATION, IT SHOULD NOT REPLACE THE EXPERTISE OF AN EXPERIENCED CRYSTALLOGRAPHIC REFEREE.

No syntax errors found.      CIF dictionary      Interpreting this report

## Datablock: Comp2

---

Bond precision:    C-C = 0.0171 Å

Wavelength=0.71073

Cell:                    a=51.185(12)            b=14.237(3)            c=24.066(5)  
                          alpha=90                beta=113.204(3)        gamma=90  
Temperature:            100 K

|                | Calculated                                                    | Reported                                          |
|----------------|---------------------------------------------------------------|---------------------------------------------------|
| Volume         | 16119(6)                                                      | 16119(6)                                          |
| Space group    | C 2/c                                                         | C 2/c                                             |
| Hall group     | -C 2yc                                                        | -C 2yc                                            |
| Moiety formula | 2(Mo12 O40 P), 3(C24 H22 Fe N10 O2), 2(C H3 N O2) [+ solvent] | 2(Mo12 O40 P), 3(C24 H22 Fe N10 O2), 2(C H3 N O2) |
| Sum formula    | C74 H72 Fe3 Mo24 N32 O90 P2 [+ solvent]                       | C74 H84 Fe3 Mo24 N32 O96 P2                       |
| Mr             | 5381.69                                                       | 5489.78                                           |
| Dx,g cm-3      | 2.218                                                         | 2.262                                             |
| Z              | 4                                                             | 4                                                 |
| Mu (mm-1)      | 2.177                                                         | 2.182                                             |
| F000           | 10304.0                                                       | 10544.0                                           |
| F000'          | 10147.79                                                      |                                                   |
| h,k,lmax       | 66,18,31                                                      | 66,18,31                                          |
| Nref           | 18526                                                         | 18288                                             |
| Tmin,Tmax      | 0.770,0.804                                                   | 0.496,0.746                                       |
| Tmin'          | 0.646                                                         |                                                   |

Correction method= # Reported T Limits: Tmin=0.496 Tmax=0.746  
AbsCorr = EMPIRICAL

Data completeness= 0.987

Theta(max)= 27.495

R(reflections)= 0.0782( 12038)

wR2(reflections)= 0.2035( 18288)

S = 1.047

Npar= 1018

---

The following ALERTS were generated. Each ALERT has the format

**test-name\_ALERT\_alert-type\_alert-level.**

Click on the hyperlinks for more details of the test.

---

### ● Alert level B

|                   |                                             |      |    |     |     |              |
|-------------------|---------------------------------------------|------|----|-----|-----|--------------|
| PLAT420_ALERT_2_B | D-H Without Acceptor                        | 01   | -- | H34 | ... | Please Check |
| PLAT430_ALERT_2_B | Short Inter D...A Contact                   | 025  | .. | N2  | ..  | 2.84 Ang.    |
| PLAT990_ALERT_1_B | Deprecated RES file style based SQUEEZE job | .... |    |     |     | ! Note       |

---

### ● Alert level C

CHEMW03\_ALERT\_2\_C The ratio of given/expected molecular weight as  
calculated from the \_atom\_site\* data lies outside  
the range 0.99 <> 1.01

From the CIF: \_cell\_formula\_units\_Z 4

From the CIF: \_chemical\_formula\_weight 5489.78

TEST: Calculate formula weight from \_atom\_site\*

| atom | mass  | num   | sum     |
|------|-------|-------|---------|
| C    | 12.01 | 74.00 | 888.81  |
| H    | 1.01  | 72.00 | 72.58   |
| N    | 14.01 | 32.00 | 448.22  |
| O    | 16.00 | 90.00 | 1439.91 |
| P    | 30.97 | 2.00  | 61.95   |
| Fe   | 55.85 | 3.00  | 167.54  |
| Mo   | 95.94 | 24.00 | 2302.56 |

Calculated formula weight 5381.57

CRYSC01\_ALERT\_1\_C The word below has not been recognised as a standard  
identifier.

yellow

CRYSC01\_ALERT\_1\_C No recognised colour has been given for crystal colour.

|                   |                                                  |                                   |       |        |
|-------------------|--------------------------------------------------|-----------------------------------|-------|--------|
| PLAT213_ALERT_2_C | Atom O5                                          | has ADP max/min Ratio .....       | 3.7   | prolat |
| PLAT213_ALERT_2_C | Atom O16                                         | has ADP max/min Ratio .....       | 3.2   | oblate |
| PLAT214_ALERT_2_C | Atom O1                                          | (Anion/Solvent) ADP max/min Ratio | 4.2   | prolat |
| PLAT221_ALERT_2_C | Solv./Anion Resd 2                               | C Ueq(max)/Ueq(min) Range         | 4.2   | Ratio  |
| PLAT223_ALERT_4_C | Solv./Anion Resd 2                               | H Ueq(max)/Ueq(min) Range         | 7.1   | Ratio  |
| PLAT234_ALERT_4_C | Large Hirshfeld Difference N1                    | -- C5 ..                          | 0.17  | Ang.   |
| PLAT234_ALERT_4_C | Large Hirshfeld Difference N4                    | -- N5 ..                          | 0.20  | Ang.   |
| PLAT234_ALERT_4_C | Large Hirshfeld Difference C10                   | -- C11 ..                         | 0.21  | Ang.   |
| PLAT241_ALERT_2_C | High 'MainMol' Ueq as Compared to Neighbors of   | C10                               | Check |        |
| PLAT244_ALERT_4_C | Low 'Solvent' Ueq as Compared to Neighbors of    | N16                               | Check |        |
| PLAT250_ALERT_2_C | Large U3/U1 Ratio for Average U(i,j) Tensor .... | 2.2                               | Note  |        |
| PLAT250_ALERT_2_C | Large U3/U1 Ratio for Average U(i,j) Tensor .... | 2.2                               | Note  |        |
| PLAT342_ALERT_3_C | Low Bond Precision on C-C Bonds .....            | 0.01715                           | Ang.  |        |
| PLAT906_ALERT_3_C | Large K value in the Analysis of Variance .....  | 12.505                            | Check |        |
| PLAT906_ALERT_3_C | Large K value in the Analysis of Variance .....  | 2.797                             | Check |        |
| PLAT911_ALERT_3_C | Missing # FCF Refl Between THmin & STh/L=        | 0.600                             | 40    | Report |
| PLAT977_ALERT_2_C | Check the Negative Difference Density on         | H8                                | -0.48 | eA-3   |
| PLAT977_ALERT_2_C | Check the Negative Difference Density on         | H12                               | -0.58 | eA-3   |
| PLAT977_ALERT_2_C | Check the Negative Difference Density on         | H18                               | -0.50 | eA-3   |
| PLAT977_ALERT_2_C | Check the Negative Difference Density on         | H19                               | -0.49 | eA-3   |
| PLAT977_ALERT_2_C | Check the Negative Difference Density on         | H21                               | -0.37 | eA-3   |
| PLAT977_ALERT_2_C | Check the Negative Difference Density on         | H24                               | -0.89 | eA-3   |
| PLAT977_ALERT_2_C | Check the Negative Difference Density on         | H26                               | -0.38 | eA-3   |
| PLAT977_ALERT_2_C | Check the Negative Difference Density on         | H28                               | -0.46 | eA-3   |
| PLAT977_ALERT_2_C | Check the Negative Difference Density on         | H29                               | -0.33 | eA-3   |
| PLAT977_ALERT_2_C | Check the Negative Difference Density on         | H30                               | -0.58 | eA-3   |
| PLAT977_ALERT_2_C | Check the Negative Difference Density on         | H32                               | -0.49 | eA-3   |
| PLAT977_ALERT_2_C | Check the Negative Difference Density on         | H34                               | -0.78 | eA-3   |
| PLAT978_ALERT_2_C | Number C-C Bonds with Positive Residual Density. | 0                                 | Note  |        |

---

## ● Alert level G

FORMU01\_ALERT\_1\_G There is a discrepancy between the atom counts in the  
\_chemical\_formula\_sum and \_chemical\_formula\_moiety. This is  
usually due to the moiety formula being in the wrong format.  
Atom count from \_chemical\_formula\_sum: C74 H84 Fe3 Mo24 N32 O96 P2  
Atom count from \_chemical\_formula\_moiety: C74 H72 Fe3 Mo24 N32 O90 P2

FORMU01\_ALERT\_2\_G There is a discrepancy between the atom counts in the  
\_chemical\_formula\_sum and the formula from the \_atom\_site\* data.  
Atom count from \_chemical\_formula\_sum: C74 H84 Fe3 Mo24 N32 O96 P2  
Atom count from the \_atom\_site data: C74 H72 Fe3 Mo24 N32 O90 P2

CELLZ01\_ALERT\_1\_G Difference between formula and atom\_site contents detected.

CELLZ01\_ALERT\_1\_G ALERT: Large difference may be due to a  
symmetry error - see SYMMG tests  
From the CIF: \_cell\_formula\_units\_Z 4  
From the CIF: \_chemical\_formula\_sum C74 H84 Fe3 Mo24 N32 O96 P2  
TEST: Compare cell contents of formula and atom\_site data

| atom | Z*formula | cif sites | diff  |
|------|-----------|-----------|-------|
| C    | 296.00    | 296.00    | 0.00  |
| H    | 336.00    | 288.00    | 48.00 |
| Fe   | 12.00     | 12.00     | 0.00  |
| Mo   | 96.00     | 96.00     | 0.00  |
| N    | 128.00    | 128.00    | 0.00  |
| O    | 384.00    | 360.00    | 24.00 |
| P    | 8.00      | 8.00      | 0.00  |

PLAT003\_ALERT\_2\_G Number of Uiso or Uij Restrained non-H Atoms ... 40 Report

PLAT007\_ALERT\_5\_G Number of Unrefined Donor-H Atoms ..... 3 Report

PLAT013\_ALERT\_1\_G N.O.K. \_shelx\_hkl\_checksum found in CIF ..... Please Check

PLAT041\_ALERT\_1\_G Calc. and Reported SumFormula Strings Differ Please Check

PLAT068\_ALERT\_1\_G Reported F000 Differs from Calcd (or Missing)... Please Check

PLAT128\_ALERT\_4\_G Alternate Setting for Input Space Group C2/c I2/a Note

PLAT178\_ALERT\_4\_G The CIF-Embedded .res File Contains SIMU Records 3 Report

PLAT187\_ALERT\_4\_G The CIF-Embedded .res File Contains RIGU Records 3 Report

PLAT432\_ALERT\_2\_G Short Inter X...Y Contact 07 .. C36 .. 2.97 Ang.

PLAT432\_ALERT\_2\_G Short Inter X...Y Contact 08 .. C13 .. 3.02 Ang.

PLAT432\_ALERT\_2\_G Short Inter X...Y Contact 025 .. C1 .. 3.01 Ang.

PLAT432\_ALERT\_2\_G Short Inter X...Y Contact 029 .. C16 .. 3.00 Ang.

PLAT432\_ALERT\_2\_G Short Inter X...Y Contact 030 .. C25 .. 2.81 Ang.

PLAT606\_ALERT\_4\_G VERY LARGE Solvent Accessible VOID(S) in Structure ! Info

PLAT860\_ALERT\_3\_G Number of Least-Squares Restraints ..... 558 Note

PLAT869\_ALERT\_4\_G ALERTS Related to the use of SQUEEZE Suppressed ! Info

PLAT910\_ALERT\_3\_G Missing # of FCF Reflection(s) Below Theta(Min) 1 Note

PLAT912\_ALERT\_4\_G Missing # of FCF Reflections Above STh/L= 0.600 197 Note

PLAT961\_ALERT\_5\_G Dataset Contains no Negative Intensities ..... Please Check

---

0 **ALERT level A** = Most likely a serious problem - resolve or explain  
3 **ALERT level B** = A potentially serious problem, consider carefully  
32 **ALERT level C** = Check. Ensure it is not caused by an omission or oversight  
23 **ALERT level G** = General information/check it is not something unexpected

9 ALERT type 1 CIF construction/syntax error, inconsistent or missing data  
30 ALERT type 2 Indicator that the structure model may be wrong or deficient  
6 ALERT type 3 Indicator that the structure quality may be low  
11 ALERT type 4 Improvement, methodology, query or suggestion  
2 ALERT type 5 Informative message, check

---

It is advisable to attempt to resolve as many as possible of the alerts in all categories. Often the minor alerts point to easily fixed oversights, errors and omissions in your CIF or refinement strategy, so attention to these fine details can be worthwhile. In order to resolve some of the more serious problems it may be necessary to carry out additional measurements or structure refinements. However, the purpose of your study may justify the reported deviations and the more serious of these should normally be commented upon in the discussion or experimental section of a paper or in the "special\_details" fields of the CIF. checkCIF was carefully designed to identify outliers and unusual parameters, but every test has its limitations and alerts that are not important in a particular case may appear. Conversely, the absence of alerts does not guarantee there are no aspects of the results needing attention. It is up to the individual to critically assess their own results and, if necessary, seek expert advice.

### **Publication of your CIF in IUCr journals**

A basic structural check has been run on your CIF. These basic checks will be run on all CIFs submitted for publication in IUCr journals (*Acta Crystallographica*, *Journal of Applied Crystallography*, *Journal of Synchrotron Radiation*); however, if you intend to submit to *Acta Crystallographica Section C* or *E* or *IUCrData*, you should make sure that full publication checks are run on the final version of your CIF prior to submission.

### **Publication of your CIF in other journals**

Please refer to the *Notes for Authors* of the relevant journal for any special instructions relating to CIF submission.

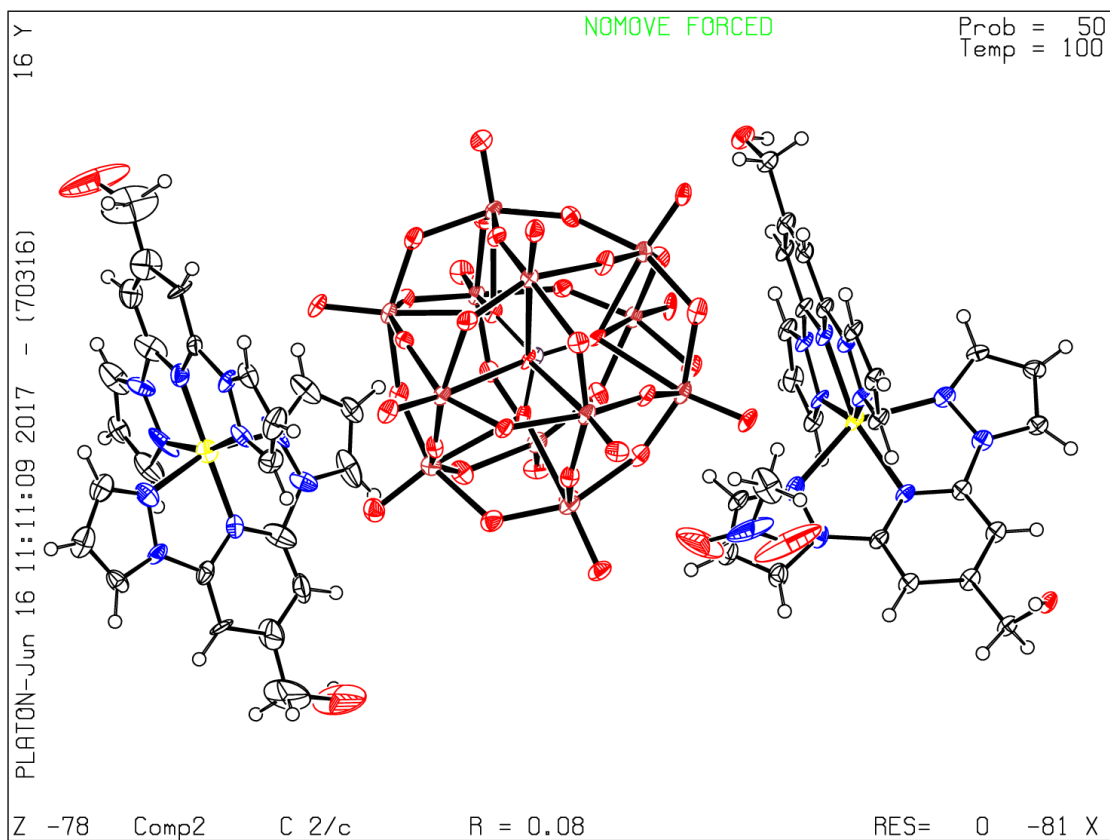

Supplement: s1 [file s1]
