# Supplementary material
Source: MDPI journal article supplement (https://www.mdpi.com/2304-6740/5/3/48)

# checkCIF/PLATON report

Structure factors have been supplied for datablock(s) Comp1

THIS REPORT IS FOR GUIDANCE ONLY. IF USED AS PART OF A REVIEW PROCEDURE FOR PUBLICATION, IT SHOULD NOT REPLACE THE EXPERTISE OF AN EXPERIENCED CRYSTALLOGRAPHIC REFEREE.

No syntax errors found.      CIF dictionary      Interpreting this report

## Datablock: Comp1

---

|                        |                             |                                    |
|------------------------|-----------------------------|------------------------------------|
| Bond precision:        | C-C = 0.0256 Å              | Wavelength=0.71073                 |
| Cell:                  | a=23.373(12)                | b=14.211(8)      c=24.002(14)      |
|                        | alpha=90                    | beta=107.455(11)      gamma=90     |
| Temperature:           | 100 K                       |                                    |
|                        | Calculated                  | Reported                           |
| Volume                 | 7605(7)                     | 7605(8)                            |
| Space group            | P 21/c                      | P 21/c                             |
| Hall group             | -P 2ybc                     | -P 2ybc                            |
|                        | Mo12 O40 P, C24 H22 Fe N10  | Mo12 O40 P, C24 H22 Fe N10         |
| Moiety formula         | O2, C16 H36 N, 2(C H3 N O2) | O2, C12 H27 N, 2(C H3 N O2), C4 H9 |
| Sum formula            | C42 H64 Fe Mo12 N13 O46 P   | C42 H64 Fe Mo12 N13 O46 P          |
| Mr                     | 2725.16                     | 2725.16                            |
| Dx, g cm <sup>-3</sup> | 2.380                       | 2.380                              |
| Z                      | 4                           | 4                                  |
| Mu (mm <sup>-1</sup> ) | 2.218                       | 2.218                              |
| F000                   | 5280.0                      | 5280.0                             |
| F000'                  | 5201.28                     |                                    |
| h,k,lmax               | 30,18,31                    | 30,18,31                           |
| Nref                   | 17476                       | 17027                              |
| Tmin,Tmax              | 0.766,0.978                 | 0.372,0.746                        |
| Tmin'                  | 0.514                       |                                    |

Correction method= # Reported T Limits: Tmin=0.372 Tmax=0.746  
AbsCorr = EMPIRICAL

Data completeness= 0.974      Theta(max)= 27.494

R(reflections)= 0.0774( 10587)      wR2(reflections)= 0.2019( 17027)

S = 1.058      Npar= 1045

---

The following ALERTS were generated. Each ALERT has the format

**test-name\_ALERT\_alert-type\_alert-level.**

Click on the hyperlinks for more details of the test.

---

**Alert level B**

|                   |                                                 |         |              |
|-------------------|-------------------------------------------------|---------|--------------|
| PLAT031_ALERT_4_B | Refined Extinction Parameter within Range ..... | 2.333   | Sigma        |
| PLAT234_ALERT_4_B | Large Hirshfeld Difference N11 -- C33 ..        | 0.26    | Ang.         |
| PLAT234_ALERT_4_B | Large Hirshfeld Difference N11 -- C37 ..        | 0.30    | Ang.         |
| PLAT342_ALERT_3_B | Low Bond Precision on C-C Bonds .....           | 0.02557 | Ang.         |
| PLAT360_ALERT_2_B | Short C(sp3)-C(sp3) Bond C39 - C40 ..           | 1.32    | Ang.         |
| PLAT420_ALERT_2_B | D-H Without Acceptor O1 -- H63 ...              |         | Please Check |

---

**Alert level C**

|                   |                                                  |                             |       |        |
|-------------------|--------------------------------------------------|-----------------------------|-------|--------|
| PLAT213_ALERT_2_C | Atom O26                                         | has ADP max/min Ratio ..... | 3.1   | prolat |
| PLAT223_ALERT_4_C | Solv./Anion Resd 3 H                             | Ueq(max)/Ueq(min) Range     | 5.0   | Ratio  |
| PLAT241_ALERT_2_C | High 'MainMol' Ueq as Compared to Neighbors of   | C33                         | Check |        |
| PLAT241_ALERT_2_C | High 'MainMol' Ueq as Compared to Neighbors of   | C37                         | Check |        |
| PLAT242_ALERT_2_C | Low 'MainMol' Ueq as Compared to Neighbors of    | N11                         | Check |        |
| PLAT242_ALERT_2_C | Low 'MainMol' Ueq as Compared to Neighbors of    | C38                         | Check |        |
| PLAT242_ALERT_2_C | Low 'MainMol' Ueq as Compared to Neighbors of    | C39                         | Check |        |
| PLAT243_ALERT_4_C | High 'Solvent' Ueq as Compared to Neighbors of   | N12                         | Check |        |
| PLAT250_ALERT_2_C | Large U3/U1 Ratio for Average U(i,j) Tensor .... | 3.3                         | Note  |        |
| PLAT250_ALERT_2_C | Large U3/U1 Ratio for Average U(i,j) Tensor .... | 3.3                         | Note  |        |
| PLAT250_ALERT_2_C | Large U3/U1 Ratio for Average U(i,j) Tensor .... | 2.8                         | Note  |        |
| PLAT360_ALERT_2_C | Short C(sp3)-C(sp3) Bond C27 - C28 ..            | 1.34                        | Ang.  |        |
| PLAT360_ALERT_2_C | Short C(sp3)-C(sp3) Bond C29 - C30 ..            | 1.43                        | Ang.  |        |
| PLAT360_ALERT_2_C | Short C(sp3)-C(sp3) Bond C33 - C34 ..            | 1.39                        | Ang.  |        |
| PLAT430_ALERT_2_C | Short Inter D...A Contact O16 .. O45 ..          | 2.88                        | Ang.  |        |
| PLAT906_ALERT_3_C | Large K value in the Analysis of Variance .....  | 3.166                       | Check |        |
| PLAT911_ALERT_3_C | Missing # FCF Refl Between THmin & STh/L=        | 0.600                       | 114   | Report |
| PLAT971_ALERT_2_C | Check Calcd Residual Density 1.01A From          | Mo5                         | 1.88  | eA-3   |
| PLAT971_ALERT_2_C | Check Calcd Residual Density 1.89A From          | C40                         | 1.83  | eA-3   |
| PLAT971_ALERT_2_C | Check Calcd Residual Density 1.28A From          | C37                         | 1.80  | eA-3   |
| PLAT971_ALERT_2_C | Check Calcd Residual Density 0.96A From          | Mo8                         | 1.75  | eA-3   |
| PLAT971_ALERT_2_C | Check Calcd Residual Density 1.12A From          | O23                         | 1.66  | eA-3   |
| PLAT971_ALERT_2_C | Check Calcd Residual Density 1.26A From          | Mo3                         | 1.65  | eA-3   |
| PLAT971_ALERT_2_C | Check Calcd Residual Density 1.28A From          | C35                         | 1.64  | eA-3   |
| PLAT971_ALERT_2_C | Check Calcd Residual Density 1.93A From          | C22                         | 1.64  | eA-3   |
| PLAT971_ALERT_2_C | Check Calcd Residual Density 0.87A From          | C24                         | 1.63  | eA-3   |
| PLAT971_ALERT_2_C | Check Calcd Residual Density 1.05A From          | Mo10                        | 1.59  | eA-3   |
| PLAT971_ALERT_2_C | Check Calcd Residual Density 0.87A From          | O22                         | 1.56  | eA-3   |
| PLAT971_ALERT_2_C | Check Calcd Residual Density 1.07A From          | C25                         | 1.54  | eA-3   |
| PLAT971_ALERT_2_C | Check Calcd Residual Density 1.06A From          | Mo1                         | 1.52  | eA-3   |
| PLAT971_ALERT_2_C | Check Calcd Residual Density 0.22A From          | Mo12                        | 1.52  | eA-3   |
| PLAT971_ALERT_2_C | Check Calcd Residual Density 0.95A From          | Mo2                         | 1.51  | eA-3   |
| PLAT972_ALERT_2_C | Check Calcd Residual Density 0.92A From          | Mo10                        | -2.10 | eA-3   |
| PLAT972_ALERT_2_C | Check Calcd Residual Density 0.83A From          | Mo1                         | -2.06 | eA-3   |
| PLAT972_ALERT_2_C | Check Calcd Residual Density 0.74A From          | Mo4                         | -1.83 | eA-3   |
| PLAT972_ALERT_2_C | Check Calcd Residual Density 0.79A From          | Mo3                         | -1.65 | eA-3   |
| PLAT972_ALERT_2_C | Check Calcd Residual Density 0.78A From          | Mo8                         | -1.58 | eA-3   |
| PLAT972_ALERT_2_C | Check Calcd Residual Density 0.72A From          | Mo7                         | -1.55 | eA-3   |
| PLAT972_ALERT_2_C | Check Calcd Residual Density 0.93A From          | Mo12                        | -1.54 | eA-3   |
| PLAT972_ALERT_2_C | Check Calcd Residual Density 0.97A From          | Mo6                         | -1.53 | eA-3   |
| PLAT972_ALERT_2_C | Check Calcd Residual Density 0.78A From          | Mo5                         | -1.52 | eA-3   |
| PLAT972_ALERT_2_C | Check Calcd Residual Density 0.70A From          | Mo2                         | -1.51 | eA-3   |
| PLAT976_ALERT_2_C | Check Calcd Residual Density 0.69A From          | O46                         | -1.21 | eA-3   |
| PLAT977_ALERT_2_C | Check the Negative Difference Density on         | H11                         | -0.41 | eA-3   |
| PLAT977_ALERT_2_C | Check the Negative Difference Density on         | H20                         | -0.52 | eA-3   |
| PLAT977_ALERT_2_C | Check the Negative Difference Density on         | H25                         | -0.70 | eA-3   |

|                   |                                                  |     |            |
|-------------------|--------------------------------------------------|-----|------------|
| PLAT977_ALERT_2_C | Check the Negative Difference Density on         | H37 | -0.36 eA-3 |
| PLAT977_ALERT_2_C | Check the Negative Difference Density on         | H39 | -0.33 eA-3 |
| PLAT977_ALERT_2_C | Check the Negative Difference Density on         | H40 | -0.86 eA-3 |
| PLAT977_ALERT_2_C | Check the Negative Difference Density on         | H41 | -0.47 eA-3 |
| PLAT977_ALERT_2_C | Check the Negative Difference Density on         | H56 | -0.33 eA-3 |
| PLAT977_ALERT_2_C | Check the Negative Difference Density on         | H59 | -0.31 eA-3 |
| PLAT977_ALERT_2_C | Check the Negative Difference Density on         | H63 | -0.35 eA-3 |
| PLAT978_ALERT_2_C | Number C-C Bonds with Positive Residual Density. |     | 0 Note     |

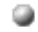

### Alert level G

|                   |                                                  |        |              |
|-------------------|--------------------------------------------------|--------|--------------|
| PLAT003_ALERT_2_G | Number of Uiso or Uij Restrained non-H Atoms ... | 55     | Report       |
| PLAT007_ALERT_5_G | Number of Unrefined Donor-H Atoms .....          | 2      | Report       |
| PLAT042_ALERT_1_G | Calc. and Reported MoietyFormula Strings Differ  |        | Please Check |
| PLAT083_ALERT_2_G | SHELXL Second Parameter in WGHT Unusually Large  | 103.57 | Why ?        |
| PLAT178_ALERT_4_G | The CIF-Embedded .res File Contains SIMU Records | 7      | Report       |
| PLAT187_ALERT_4_G | The CIF-Embedded .res File Contains RIGU Records | 7      | Report       |
| PLAT343_ALERT_2_G | Unusual sp3 Angle Range in Main Residue for      | C35    | Check        |
| PLAT432_ALERT_2_G | Short Inter X...Y Contact O6 .. C21 ..           | 2.99   | Ang.         |
| PLAT432_ALERT_2_G | Short Inter X...Y Contact O8 .. C17 ..           | 2.86   | Ang.         |
| PLAT432_ALERT_2_G | Short Inter X...Y Contact O26 .. C4 ..           | 2.96   | Ang.         |
| PLAT860_ALERT_3_G | Number of Least-Squares Restraints .....         | 687    | Note         |
| PLAT912_ALERT_4_G | Missing # of FCF Reflections Above STh/L= 0.600  | 335    | Note         |
| PLAT960_ALERT_3_G | Number of Intensities with I < - 2*sig(I) ...    | 61     | Check        |

- 
- 0 **ALERT level A** = Most likely a serious problem - resolve or explain  
 6 **ALERT level B** = A potentially serious problem, consider carefully  
 54 **ALERT level C** = Check. Ensure it is not caused by an omission or oversight  
 13 **ALERT level G** = General information/check it is not something unexpected
- 1 ALERT type 1 CIF construction/syntax error, inconsistent or missing data  
 58 ALERT type 2 Indicator that the structure model may be wrong or deficient  
 5 ALERT type 3 Indicator that the structure quality may be low  
 8 ALERT type 4 Improvement, methodology, query or suggestion  
 1 ALERT type 5 Informative message, check
-

It is advisable to attempt to resolve as many as possible of the alerts in all categories. Often the minor alerts point to easily fixed oversights, errors and omissions in your CIF or refinement strategy, so attention to these fine details can be worthwhile. In order to resolve some of the more serious problems it may be necessary to carry out additional measurements or structure refinements. However, the purpose of your study may justify the reported deviations and the more serious of these should normally be commented upon in the discussion or experimental section of a paper or in the "special\_details" fields of the CIF. checkCIF was carefully designed to identify outliers and unusual parameters, but every test has its limitations and alerts that are not important in a particular case may appear. Conversely, the absence of alerts does not guarantee there are no aspects of the results needing attention. It is up to the individual to critically assess their own results and, if necessary, seek expert advice.

### **Publication of your CIF in IUCr journals**

A basic structural check has been run on your CIF. These basic checks will be run on all CIFs submitted for publication in IUCr journals (*Acta Crystallographica*, *Journal of Applied Crystallography*, *Journal of Synchrotron Radiation*); however, if you intend to submit to *Acta Crystallographica Section C* or *E* or *IUCrData*, you should make sure that full publication checks are run on the final version of your CIF prior to submission.

### **Publication of your CIF in other journals**

Please refer to the *Notes for Authors* of the relevant journal for any special instructions relating to CIF submission.

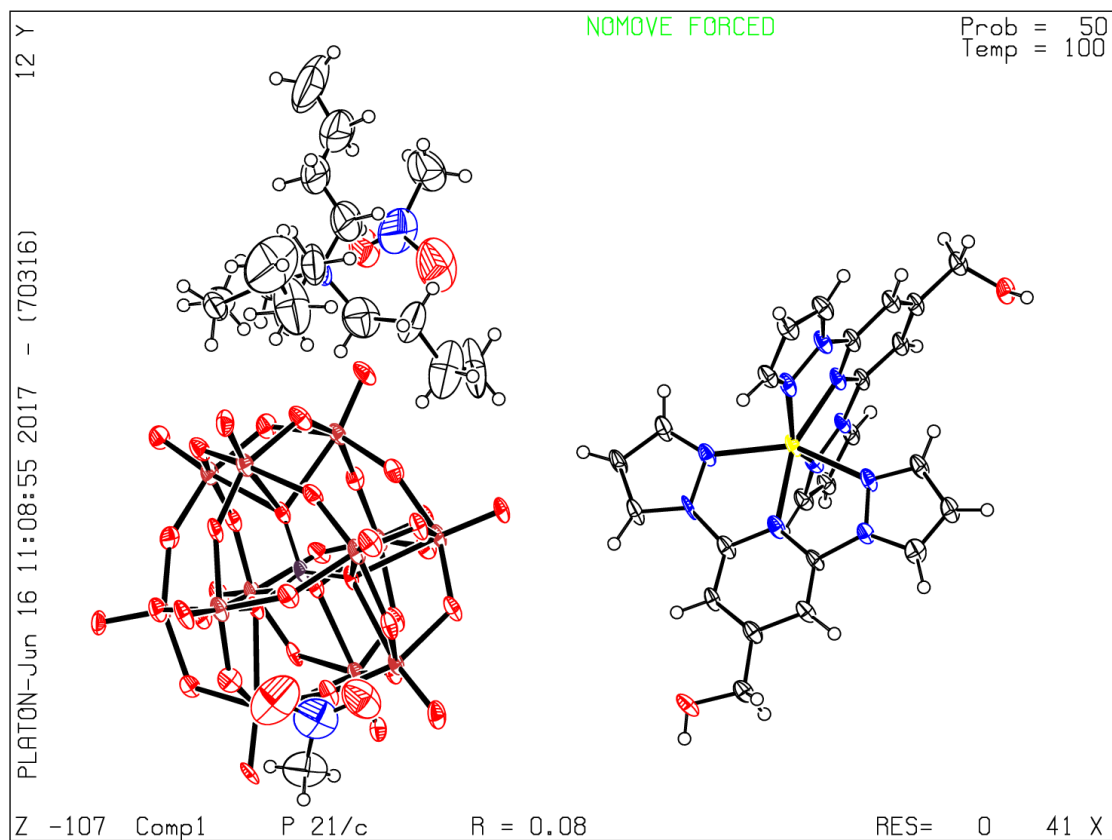

Supplement: s1 [file s1]
